# Supplementary material for: Assessing cross-species transmission of hemoplasmas at the wild-domestic felid interface in Chile using genetic and landscape variables analysis
Source: PubMed Central journal article supplement (PMC6856521; doi:10.1038/s41598-019-53184-4), 2019-11-14
Supplement: 41598_2019_53184_MOESM1_ESM.pdf [file 41598_2019_53184_MOESM1_ESM.pdf]

**Assessing cross-species transmission of hemoplasmas at the wild-domestic felid interface in Chile using genetic and landscape variables analysis**

Sacristán I<sup>1</sup>, Acuña F<sup>2</sup>, Aguilar E<sup>2</sup>, García S<sup>2</sup>, López MJ<sup>2</sup>, Cevidanes A<sup>1</sup>, Cabello J<sup>3,4</sup>, Hidalgo-Hermoso E<sup>5</sup>, Johnson WE<sup>6,7</sup>, Poulin E<sup>8,9</sup>, Millán J<sup>10</sup>, Napolitano C<sup>8,11\*</sup>

SUPPLEMENTARY MATERIAL

Table S1. Best model representing multivariable relationships between predictor variables and total hemoplasma species, *Candidatus Mycoplasma haemominutum* and *Mycoplasma haemofelis* infection in guignas, using logistic regression analysis (n=102). Season variable was evaluated in 100 samples.

|                                                  |                             | Regression coefficient | SE   | Adjusted odds ratio | 95% confidence interval | P value | Hosmer Lemeshow test |
|--------------------------------------------------|-----------------------------|------------------------|------|---------------------|-------------------------|---------|----------------------|
| <b>Total hemoplasma spp</b>                      | Fragmented landscape        | -2.50                  | 0.94 | 0.08                | -4.52-0.77              | 0.008   |                      |
|                                                  | Chiloe Island               | 1.03                   | 0.87 | 2.81                | -0.67-2.84              | 0.23    |                      |
|                                                  | Rainy temperate area        | 2.11                   | 0.85 | 8.25                | 0.50-3.93               | 0.01    | <i>p</i> -value=0.7  |
|                                                  | Oceanic cold temperate area | 0.70                   | 1.33 | 2.03                | -1.86-3.45              | 0.59    |                      |
|                                                  | Warm season                 | -0.40                  | 0.48 | 0.65                | 0.25-1.73               | 0.38    |                      |
| <b><i>Candidatus Mycoplasma haemominutum</i></b> | Fragmented landscape        | -1.70                  | 0.86 | 0.18                | -3.47-0.05              | 0.04    | <i>p</i> -value =0.6 |
|                                                  | Chiloe Island               | 1.90                   | 1.21 | 6.69                | -0.23-4.97              | 0.12    |                      |
|                                                  | Rainy temperate area        | 2.62                   | 1.17 | 13.85               | -3.47-0.05              | 0.02    |                      |
|                                                  | Oceanic cold temperate area | 1.19                   | 1.51 | 3.315               | 0.49-4.36               | 0.43    |                      |
|                                                  | Warm season                 | -0.16                  | 0.57 | 0.85                | 0.28-2.72               | 0.77    |                      |
| <b><i>Mycoplasma haemofelis</i></b>              | Fragmented landscape        | -2.48                  | 1.10 | 0.08                | -4.87 -0.43             | 0.02    | <i>p</i> -value =0.6 |
|                                                  | Chiloe Island               | -0.18                  | 1.21 | 0.83                | -2.74- 2.23             | 0.88    |                      |
|                                                  | Rainy temperate area        | 0.06                   | 1.19 | 1.06                | -2.50- 2.44             | 0.96    |                      |
|                                                  | Oceanic cold temperate area | 0.64                   | 1.50 | 1.09                | -2.34-3.73              | 0.67    |                      |
|                                                  | Warm season                 | -0.29                  | 0.68 | 0.76                | 0.20-3.18               | 0.67    |                      |

Table S2. Best model representing multivariable relationships between predictor variables and total hemoplasma species, *Candidatus Mycoplasma haemominutum* and *Mycoplasma haemofelis* infection in domestic cats, using logistic regression analysis (n=262). Season variable was evaluated in 213 samples.

|                                                  |                             | <b>Regression coefficient</b> | <b>SE</b> | <b>Adjusted odds ratio</b> | <b>95% confidence interval</b> | <b>P value</b> | <b>Hosmer Lemeshow test</b> |                      |
|--------------------------------------------------|-----------------------------|-------------------------------|-----------|----------------------------|--------------------------------|----------------|-----------------------------|----------------------|
| <b>Total hemoplasma spp.</b>                     | Sex male                    | 0.71                          | 0.36      | 2.04                       | 1.02-4.26                      | 0.05           | <i>p</i> -value=0.11        |                      |
|                                                  | Age juvenile                | -0.82                         | 0.65      | 0.44                       | 0.09-1.35                      | 0.20           |                             |                      |
|                                                  | Mediterranean area          | -0.57                         | 0.56      | 0.6                        | 0.17-1.6                       | 0.30           |                             |                      |
|                                                  | Rainy temperate area        | -0.70                         | 0.44      | 0.50                       | 0.20-1.16                      | 0.11           |                             |                      |
|                                                  | Oceanic-cold temperate area | -0.6                          | 0.49      | 0.63                       | 0.23-1.62                      | 0.24           |                             |                      |
|                                                  | Warm season                 | -0.13                         | 0.40      | 0.88                       | 0.38-1.94                      | 0.75           |                             | <i>p</i> -value=1.00 |
|                                                  |                             |                               |           |                            |                                |                |                             |                      |
| <b><i>Candidatus Mycoplasma haemominutum</i></b> | Sex male                    | 0.75                          | 0.43      | 2.12                       | 0.92-5.18                      | 0.08           | <i>p</i> -value=0.15        |                      |
|                                                  | Age juvenile                | -0.96                         | 0.78      | 0.38                       | 0.058-1.43                     | 0.21           |                             |                      |
|                                                  | Mediterranean area          | 0.52                          | 0.64      | 1.68                       | 0.46-5.98                      | 0.41           |                             |                      |
|                                                  | Rainy temperate area        | -0.13                         | 0.58      | 0.88                       | 0.27-2.87                      | 0.82           |                             |                      |
|                                                  | Oceanic-cold temperate area | 0.65                          | 0.58      | 1.90                       | 0.61-6.27                      | 0.26           |                             |                      |
|                                                  | Warm season                 | -0.15                         | 0.43      | 0.85                       | 0.35-2.0                       | 0.72           |                             | <i>p</i> -value=1.00 |
|                                                  |                             |                               |           |                            |                                |                |                             |                      |
| <b><i>Mycoplasma haemofelis</i></b>              | Sex male                    | 0.45                          | 0.55      | 1.59                       | 0.55- 4.92                     | 0.39           | <i>p</i> -value=0.68        |                      |
|                                                  | Age juvenile                | -0.65                         | 1.07      | 0.52                       | 0.02- 2.90                     | 0.54           |                             |                      |
|                                                  | Mediterranean area          | -1.48                         | 1.01      | 0.23                       | 0.02-1.23                      | 0.14           |                             |                      |
|                                                  | Rainy temperate area        | -0.79                         | 0.60      | 0.45                       | 0.13-1.42                      | 0.18           |                             |                      |
|                                                  | Oceanic-cold temperate area | -2.02                         | 1.09      | 0.13                       | 0.01- 0.78                     | 0.06           |                             |                      |
|                                                  | Warm season                 | 0.02                          | 0.72      | 1.01                       | 0.23-4.5                       | 0.97           |                             | <i>p</i> -value=1.00 |
|                                                  |                             |                               |           |                            |                                |                |                             |                      |

Table S3. Hematological parameters of each hemoplasma positive guignas. Hematological normal values of *Leopardus geoffroyi*, the most closely genetically related species with the guigna, are provided for comparison.

| ID                           | Sex    | Age      | Hemoplasma species | Hemoplasma blood smear status | RBC (x10 <sup>6</sup> /μL) | Haemoglobin (g/dL) | Haematocrit (%) | MCV fL  | MCHC g/dL | WBC (x10 <sup>3</sup> /μL <sup>-1</sup> ) | Segmented neutrophil (x10 <sup>3</sup> /μL <sup>-1</sup> ) | Lymphocyte (x10 <sup>3</sup> /μL <sup>-1</sup> ) | Monocyte (x10 <sup>3</sup> /μL <sup>-1</sup> ) | Eosinophil (x10 <sup>3</sup> /μL <sup>-1</sup> ) | Platelets (x10 <sup>5</sup> /μL <sup>-1</sup> ) |
|------------------------------|--------|----------|--------------------|-------------------------------|----------------------------|--------------------|-----------------|---------|-----------|-------------------------------------------|------------------------------------------------------------|--------------------------------------------------|------------------------------------------------|--------------------------------------------------|-------------------------------------------------|
| <i>Leopardus geoffroyi</i> * | -      | -        | -                  | -                             | 6.71-9.25                  | 11.5-14.9          | 35.2-47.8       | 47-55.8 | 30.2-35.6 | 5.38-14.22                                | 3.35-9.16                                                  | 1.03-3.15                                        | 0.06-0.56                                      | 0-1.44                                           | 2.80-3.86                                       |
| LG151                        | Male   | Juvenile | <i>Mhf</i>         | (-)                           | 6.46 **                    | 11.9               | 38.4            | 59.4**  | 31.0      | 3.80**                                    | 1.97**                                                     | 1.63                                             | 0.19                                           | 0.00                                             | 4.15**                                          |
| LG158                        | Female | Adult    | <i>CMhm</i>        | (-)                           | 8.74                       | 15.9**             | 40.0            | 46.0    | 39.8**    | 10.60                                     | 8.48                                                       | 1.06                                             | 0.10                                           | 0.00                                             | 4.45**                                          |
| LG159                        | Male   | Juvenile | <i>CMhm</i>        | (+)                           | 6.67                       | 12.0               | 38.0            | 57.0**  | 32.0      | 10.20                                     | 6.42                                                       | 2.95                                             | 0.10                                           | 0.61                                             | 5.46**                                          |
| LG160                        | Male   | Adult    | <i>CMhm+Mhf</i>    | (+)                           | 6.73                       | 12.8               | 39.0            | 57.0**  | 33.0      | 7.00                                      | 5.46                                                       | 1.26                                             | 0.14                                           | 0.14                                             | 3.06                                            |
| LG172                        | Male   | Juvenile | <i>CMhm+Mhf</i>    | (-)                           | 6.48**                     | 13.3               | 35.0**          | 54.0    | 34.0      | 13.20                                     | 10.56**                                                    | 1.71                                             | 0.66                                           | 0.00                                             | 1.66                                            |
| LG175                        | Male   | Juvenile | <i>CMhm + Mhf</i>  | (-)                           | 6.92                       | 13.8               | 44.9            | 65.0**  | 30.6      | 10.24                                     | 7.07                                                       | 3.12                                             | 0.06                                           | 0.00                                             | 7.98**                                          |
| LG176                        | Male   | Adult    | <i>Mhf</i>         | (-)                           | 7.32                       | 13.6               | 44.1            | 60.0**  | 30.8      | 14.71                                     | 10.80**                                                    | 3.06                                             | 0.86**                                         | 0.00                                             | 6.68**                                          |
| LG177                        | Female | Adult    | <i>Mycosp.+Mhf</i> | (-)                           | 8.89                       | 15.9**             | 54.8**          | 62.0**  | 28.9**    | 21.70                                     | 10.24**                                                    | 11.35**                                          | 0.11                                           | 0.00                                             | 6.64**                                          |
| LG190                        | Male   | Adult    | <i>CMhm</i>        | (-)                           | 9.31**                     | 15.5**             | 48.4            | 52.0    | 32.0      | 5.20**                                    | 4.05                                                       | 0.83**                                           | 0.26                                           | 0.05                                             | 1.96                                            |
| LG191                        | Male   | Adult    | <i>CMhm</i>        | (-)                           | 8.70                       | 13.5               | 42.1            | 48.0    | 32.0      | 6.40                                      | 4.22                                                       | 1.92                                             | 0.19                                           | 0.06                                             | 0.76                                            |
| LG192                        | Female | Adult    | <i>Mhf</i>         | (-)                           | 8.34                       | 15.5**             | 46.9            | 56.0**  | 33.0      | 12.80                                     | 10.75**                                                    | 1.40                                             | 0.51                                           | 0.12                                             | 1.92                                            |

\*Hematological normal values of *Leopardus geoffroyi* <sup>66</sup>

\*\*Abnormal hematological values in relation to the normal values of *Leopardus geoffroyi*.

Table S4. Serum biochemistry parameters of each hemoplasma positive guignas. Biochemical normal values of *Leopardus geoffroyi*, the most closely genetically related species with the guignas, are provided for comparison.

| ID                           | Sex    | Age      | Hemoplasma species | Hemoplasma blood smear status | TP g/dL | Albumin g/dL | Globulin g/dL | TBIL mg/dL | ALT IU/L | FA IU/L | GGT IU/L | AST IU/L | Calcium mg/dL | Phosphorus mg/dL | Creatinine mg/dL | BUN mg/dL | Total cholesterol mg/dL | Glucose mg/dL |
|------------------------------|--------|----------|--------------------|-------------------------------|---------|--------------|---------------|------------|----------|---------|----------|----------|---------------|------------------|------------------|-----------|-------------------------|---------------|
| <i>Leopardus geoffroyi</i> * | -      | -        | -                  | -                             | 6.9-8.7 | 2.4-3.8      | 3.8-5.2       | 0.1-1.1    | 13-60    | -       | -        | 24-68    | 8.7-11.1      | 3.7-6.5          | 0.8-2.6          | 19-68     | -                       | 145-265       |
| LG158                        | Female | Adult    | CMhm               | (-)                           | -       | -            | -             | -          | 182**    | -       | -        | 258**    | 1.84          | 1.6              | 29.0**           | 14.4      | -                       | -             |
| LG159                        | Male   | Juvenile | CMhm               | (+)                           | 8.7     | 4.5**        | 4.2           | 0.20       | 69.0**   | 90      | 2.0      | 150**    | 8.6           | 6.0              | 1.6              | 49.0      | 212                     | 82**          |
| LG160                        | Male   | Adult    | CMhm+Mhf           | (+)                           | 6.5     | 4.1**        | 2.4           | 0.40       | 77.0**   | 35      | 2.0      | 296**    | 9.5           | 5.9              | 1.2              | 50.0      | 188                     | 107**         |
| LG172                        | Male   | Juvenile | CMhm+Mhf           | (-)                           | 7.2     | 4.3**        | 2.9           | 0.20       | 56.8     | 35      | 3.2      | 152**    | 8.7           | 4.2              | 0.8              | 33.3      | 160                     | 87**          |
| LG175                        | Male   | Juvenile | CMhm + Mhf         | (-)                           | 11.2**  | 4.4**        | 6.8**         | 0.30       | 6.4      | 8000    | 2.9      | 176**    | 10.0          | 13.6**           | 0.4**            | 37.4      | 156                     | 14**          |
| LG176                        | Male   | Adult    | Mhf                | (-)                           | 8.4     | 3.8          | 4.6           | 0.24       | 47.0     | 40      | 4.3      | 162**    | 9.4           | 5.2              | 0.8              | 61.3      | 158                     | 42**          |
| LG177                        | Female | Adult    | Mycosp.+Mhf        | (-)                           | 9.6**   | 4.0**        | 5.6           | 0.37       | 32.4     | 50      | 8.2      | 134**    | 10.0          | 5.6              | 0.8              | 49.1      | 146                     | 42**          |
| LG190                        | Male   | Adult    | CMhm               | (-)                           | 8.8**   | 3.3          | 5.7           | 0.26       | 76.3**   | 36.2    | 2.8      | 255**    | 8.6           | 3.3              | 1.0              | 41.0      | 226                     | 103           |
| LG191                        | Male   | Adult    | CMhm               | (-)                           | 7.6     | 3.0          | 4.6           | 0.25       | 73.2**   | 42.9    | 2.5      | 261**    | 10.5          | 7.2              | 1.0              | 57.4      | 257                     | 156           |
| LG192                        | Female | Adult    | Mhf                | (-)                           | 7.7     | 3.1          | 4.6           | 0.22       | 85.2**   | 35.1    | 1.0      | 195**    | 9.5           | 4.9              | 1.0              | 33.6      | 208                     | 92**          |

\*Biochemical normal values of *Leopardus geoffroyi*<sup>66</sup>.

\*\*Abnormal biochemical values in relation to the normal values of *Leopardus geoffroyi*.

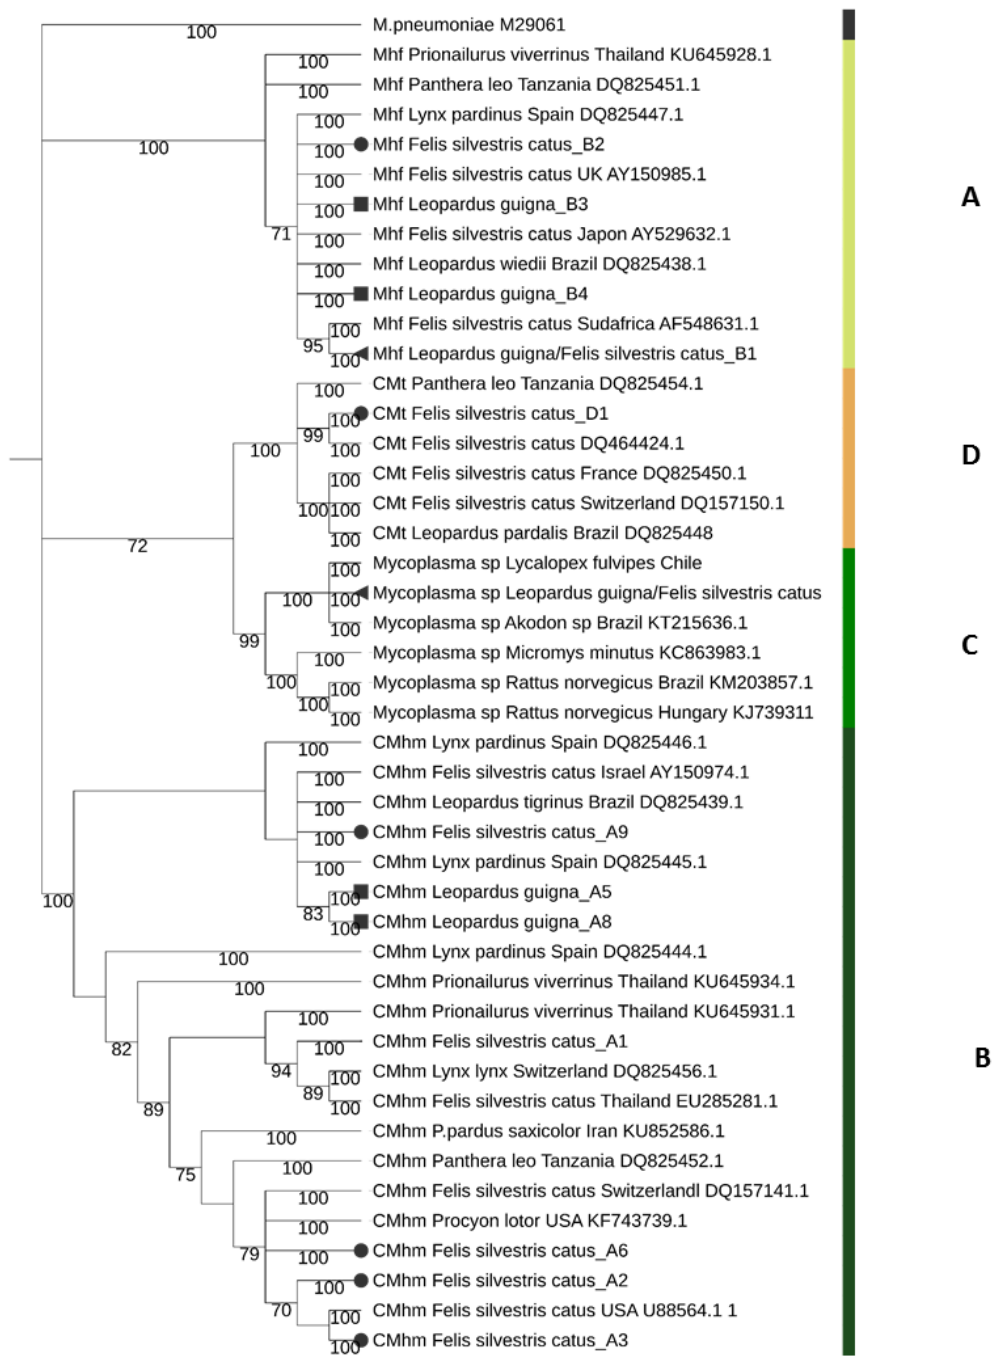

Figure S1. Bayesian tree of 944 bp of 16S rRNA gene for guigna and domestic cat sequences. *M. pneumoniae* sequence has been used as outgroup. Posterior probabilities are given at the nodes of the tree, expressed as percentage, only values of  $\geq 70$  are shown. Circles, squares and diamonds show domestic cat ntST, guigna ntST and shared ntST from this study.

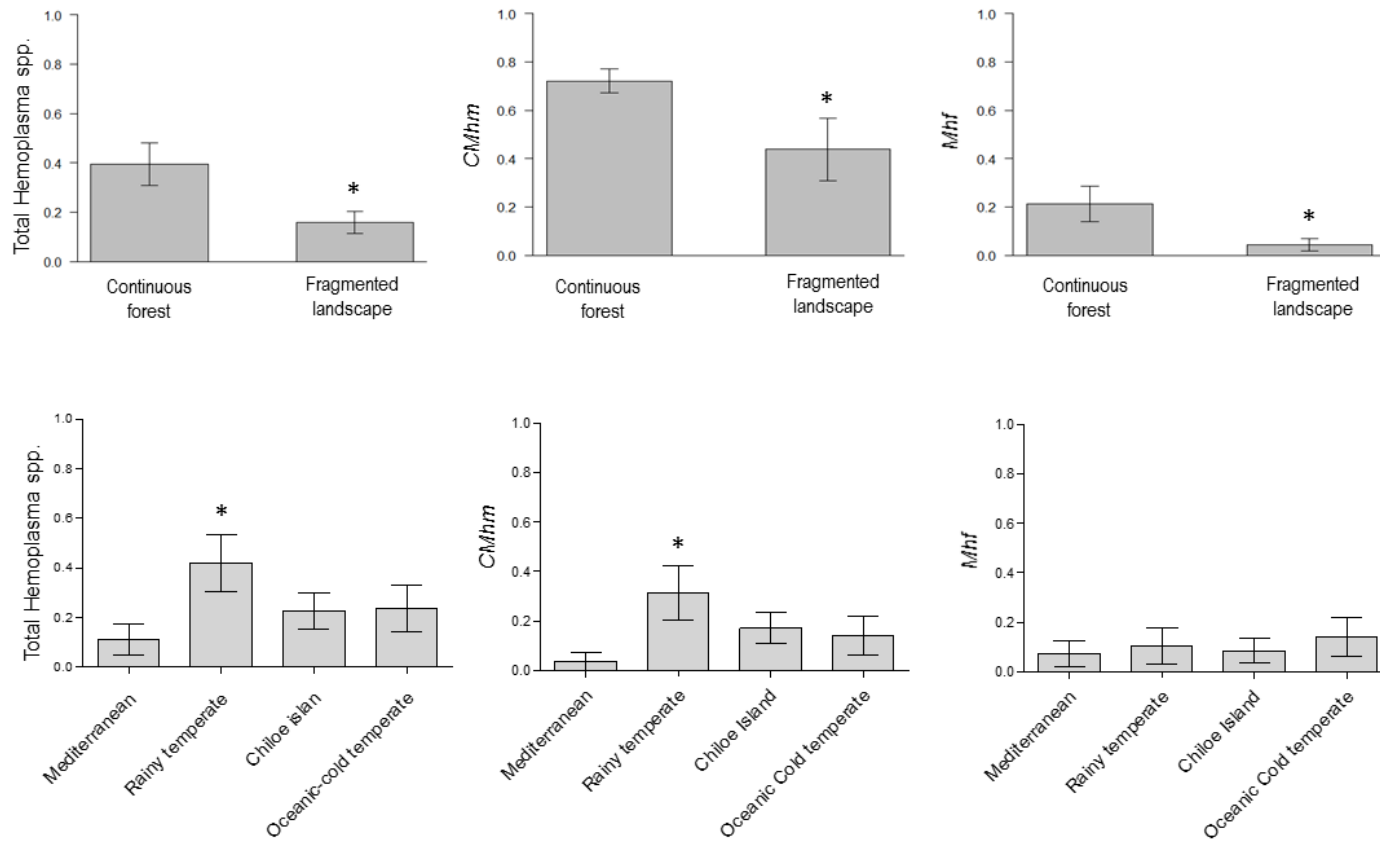

Figure S2. Bar graphs representing the prevalence of total hemoplasma species the two more prevalent hemoplasma species (*Candidatus Mycoplasma haemominutum* and *Mycoplasma haemofelis*) depending on the different bioclimatic areas of study and land use variables.

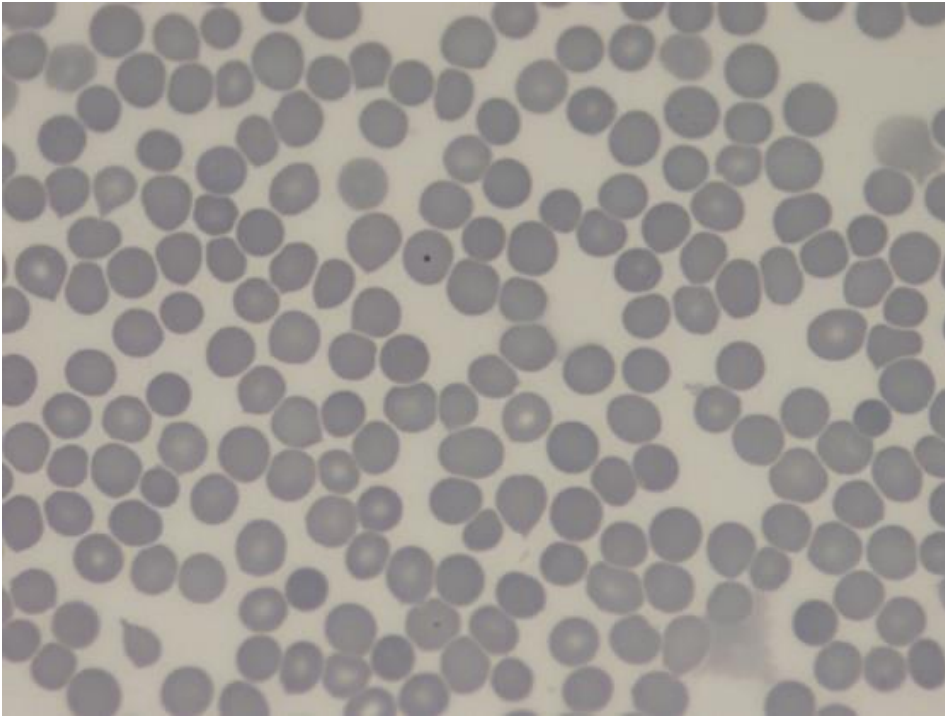

Figure S3. Blood smear images showing a structure compatible with hemoplasma.



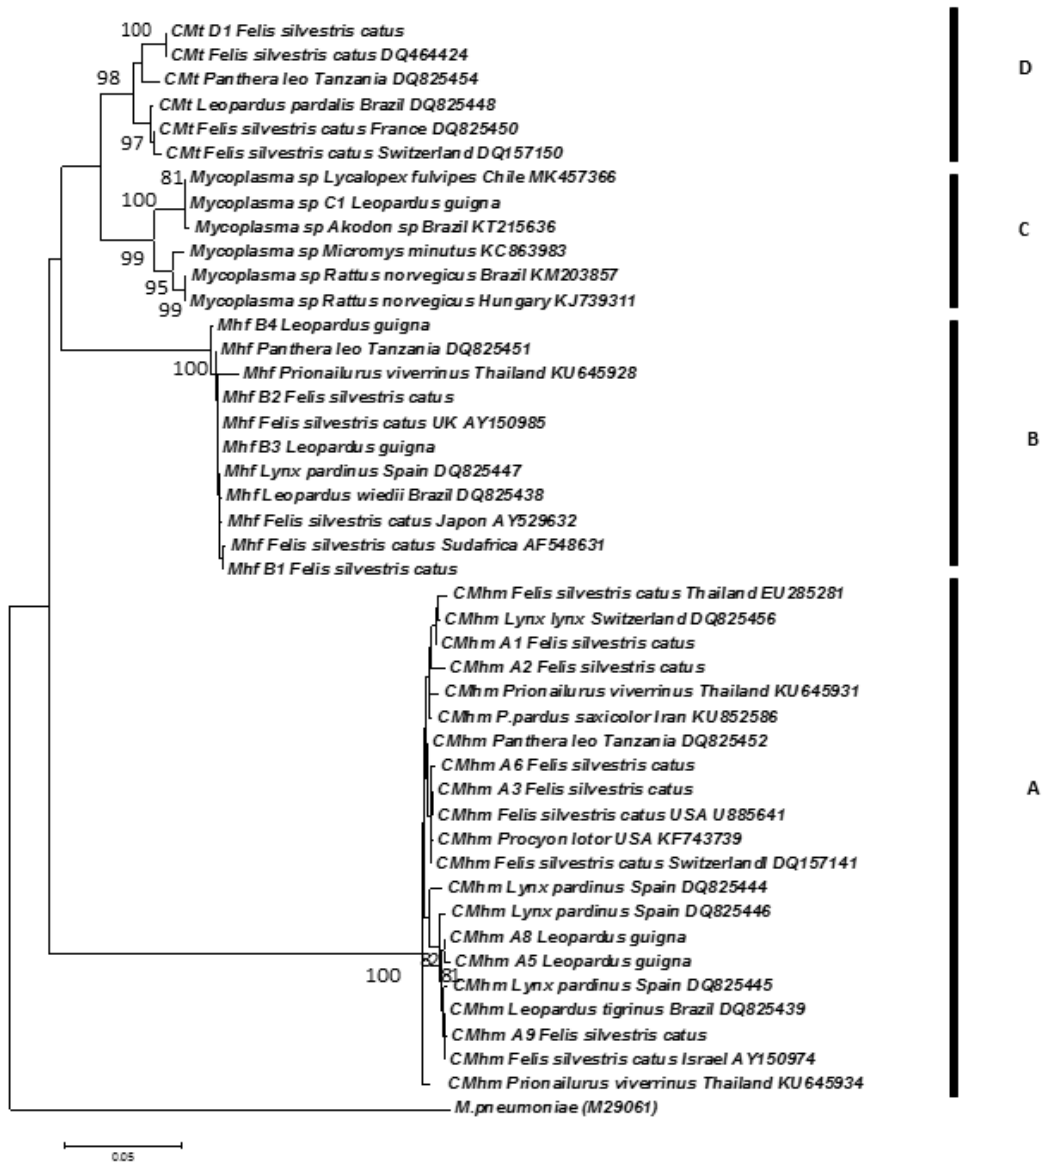

Figure S4. Neighbor-joining tree of 944 bp of the 16S rRNA gene for guigna and domestic cat. *M. pneumoniae* sequence has been used as outgroup. Bootstrap values of  $\geq 70$  are printed at the nodes of the tree. The Bayesian phylogenetic tree and maximum likelihood phylogenetic tree were congruent. The four phylogenetic (taxonomic) groups are labelled A, B, C and D.
